# Supplementary material for: Associations between the VDR Gene rs731236 (TaqI) Polymorphism and Bone Mineral Density in Postmenopausal Women from the RAC-OST-POL
Source: MDPI journal article supplement (doi:10.3390/biomedicines12040917), 2024-04-20
Supplement: s1 [file s1]

Table S1. *VDR* gene variations information.

| SNP                | Ref | Alt | Position       | GMAF   |
|--------------------|-----|-----|----------------|--------|
| rs7975232<br>ApaI  | C   | A   | chr12:47845054 | 0.4959 |
| rs731236<br>TaqI   | A   | G   | chr12:47844974 | 0.264  |
| rs1544410<br>Bsm I | C   | T   | chr12:47846052 | 0.2649 |

SNP - single nucleotide variations

Ref - reference allele

Alt - alternative allele

Position - position in the genome according to Homo sapiens (human) genome assembly

GRCh38 (hg38\_HC) GRCh38.p14 chr 12

GMAF – global minor allele frequency
